# Supplementary material for: Polystyrene Nanocomposites Reinforced with Novel Dumbbell-Shaped Phenyl-POSSs: Synthesis and Thermal Characterization
Source: MDPI journal article supplement (doi:10.3390/polym11091475), 2019-09-09
Supplement: s1 [file s1]

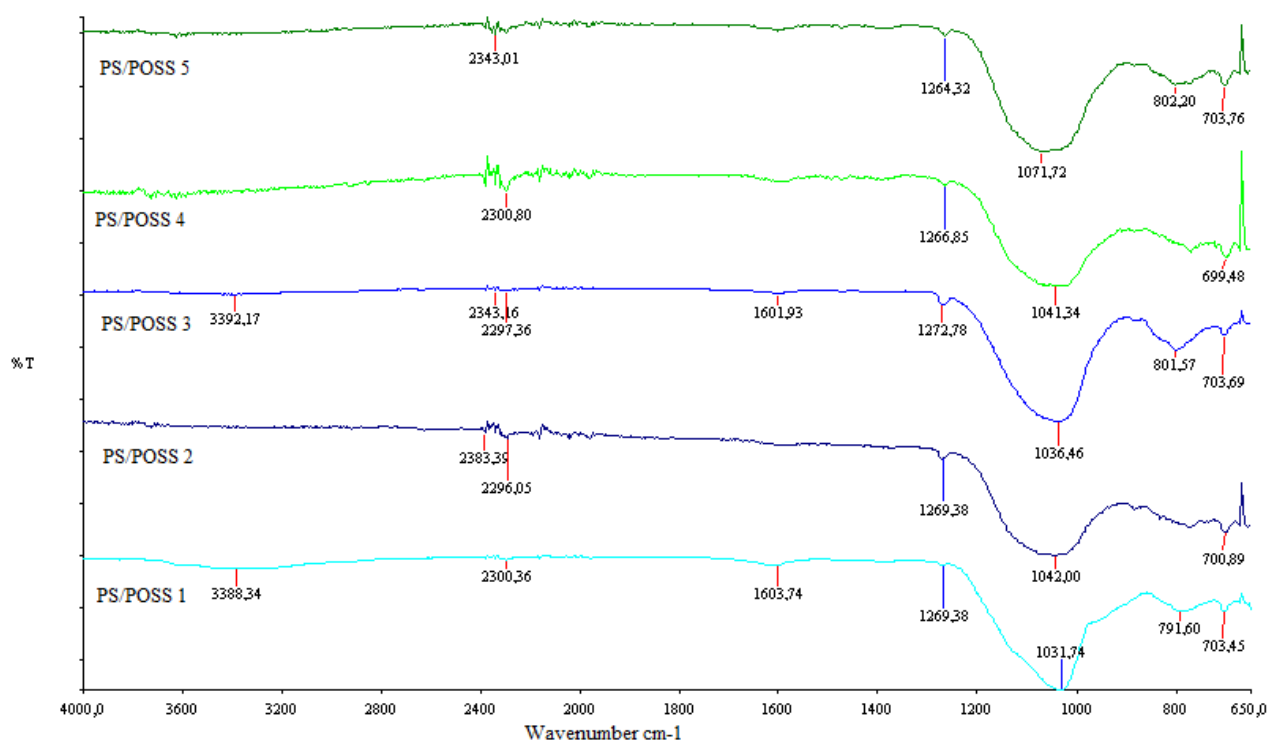

**Figure S1.** FTIR spectra of the residues at 700 °C, in flowing nitrogen, for the obtained nanocomposites.

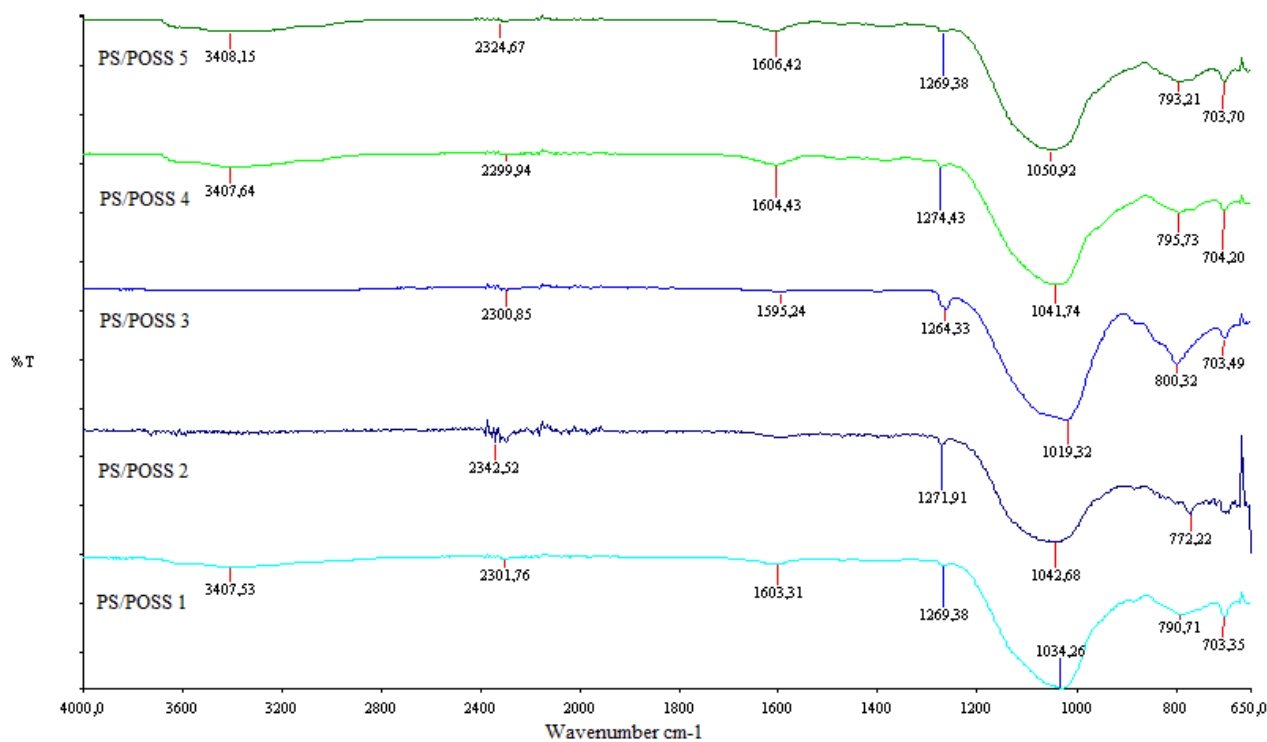

**Figure S2** FTIR spectra of the residues at 700 °C, in static air atmosphere, for the obtained nanocomposites.
